# Supplementary material for: Exploiting the Combination of Natural and Genetically Engineered Resistance to Cassava Mosaic and Cassava Brown Streak Viruses Impacting Cassava Production in Africa
Source: PLoS One. 2012 Sep 25;7(9):e45277. doi: 10.1371/journal.pone.0045277 (PMC3458115; doi:10.1371/journal.pone.0045277)
Supplement: Table S1 — Summary table of small RNA duplexes between 21nt CBSV-CP hairpin-derived small RNA and UCBSV-CP target sequence. (XLSX) [file pone.0045277.s007.xlsx]

## Sheet: Target inf -25
ID	Virtually diced sRNAs	Target	Pairing	First sRNA nucleotide involved in the pairing	Last sRNA nucleotide involved in the pairing	First target nucleotide involved in the pairing	Last target nucleotide involved in the pairing	Free NRJ (kCal/mol)
1	>CBSV_JN091565.1_538-1063.seq|revcomp 0 21	>UCBSV_HM346952_1034-1553.seq	.(((.((((((((((((((((&)))))))))))))))).))).	1	21	1	21	-28.1
2	>CBSV_JN091565.1_538-1063.seq|revcomp 1 21	>UCBSV_HM346952_1034-1553.seq	(.(((.(((((((((((((((&.))))))))))))))).))).).	1	21	1	23	-25.4
3	>CBSV_JN091565.1_538-1063.seq|revcomp 3 21	>UCBSV_HM346952_1034-1553.seq	(((.(((.(((((((((((((&.))))))))))))).))).))).	1	21	3	25	-25.7
4	>CBSV_JN091565.1_538-1063.seq|revcomp 4 21	>UCBSV_HM346952_1034-1553.seq	((((.(((.((((((((((((&.)))))))))))).))).)))).	1	21	4	26	-28.7
5	>CBSV_JN091565.1_538-1063.seq|revcomp 5 21	>UCBSV_HM346952_1034-1553.seq	.((((.(((.(((((((((((&.))))))))))).))).)))).	1	21	5	26	-26.2
6	>CBSV_JN091565.1_538-1063.seq|revcomp 6 21	>UCBSV_HM346952_1034-1553.seq	.((((.(((.((((((((((&.)))))))))).))).)))).	2	21	6	26	-25.2
7	>CBSV_JN091565.1_538-1063.seq|revcomp 39 21	>UCBSV_HM346952_1034-1553.seq	((((((((((.((.(((((.&.))))).)).)))))))))).	1	20	41	61	-25.6
8	>CBSV_JN091565.1_538-1063.seq|revcomp 40 21	>UCBSV_HM346952_1034-1553.seq	(((((((((((.((.(((((.&.))))).)).))))))))))).	1	21	41	62	-27
9	>CBSV_JN091565.1_538-1063.seq|revcomp 41 21	>UCBSV_HM346952_1034-1553.seq	((((((((((((.((.(((((&.))))).)).)))))))))))).	1	21	41	63	-27.2
10	>CBSV_JN091565.1_538-1063.seq|revcomp 42 21	>UCBSV_HM346952_1034-1553.seq	(((((((((((((.((.((((&.)))).)).))))))))))))).	1	21	42	64	-25.7
11	>CBSV_JN091565.1_538-1063.seq|revcomp 43 21	>UCBSV_HM346952_1034-1553.seq	((((((((((((((.((.(((&.))).)).)))))))))))))).	1	21	43	65	-25.3
12	>CBSV_JN091565.1_538-1063.seq|revcomp 52 21	>UCBSV_HM346952_1034-1553.seq	((((((((.((((((((((((&.)))))))))))).)))))))).	1	21	52	74	-27.4
13	>CBSV_JN091565.1_538-1063.seq|revcomp 53 21	>UCBSV_HM346952_1034-1553.seq	.((((((((.(((((((((((&.))))))))))).)))))))).	1	21	53	74	-25.7
14	>CBSV_JN091565.1_538-1063.seq|revcomp 61 21	>UCBSV_HM346952_1034-1553.seq	((((((((.((((((((.&.)))))))).)))))))).	1	18	65	83	-25.5
15	>CBSV_JN091565.1_538-1063.seq|revcomp 62 21	>UCBSV_HM346952_1034-1553.seq	(((((((((.((((((((.&.)))))))).))))))))).	1	19	65	84	-26.2
16	>CBSV_JN091565.1_538-1063.seq|revcomp 63 21	>UCBSV_HM346952_1034-1553.seq	((((((((((.((((((((.&.)))))))).)))))))))).	1	20	65	85	-26.9
17	>CBSV_JN091565.1_538-1063.seq|revcomp 64 21	>UCBSV_HM346952_1034-1553.seq	(((((((((((.((((((((.&.)))))))).))))))))))).	1	21	65	86	-28.1
18	>CBSV_JN091565.1_538-1063.seq|revcomp 65 21	>UCBSV_HM346952_1034-1553.seq	((((((((((((.((((((((&.)))))))).)))))))))))).	1	21	65	87	-29.4
19	>CBSV_JN091565.1_538-1063.seq|revcomp 66 21	>UCBSV_HM346952_1034-1553.seq	(((((((((((((.(((((((&.))))))).))))))))))))).	1	21	66	88	-28.7
20	>CBSV_JN091565.1_538-1063.seq|revcomp 67 21	>UCBSV_HM346952_1034-1553.seq	((((((((((((((.((((((&.)))))).)))))))))))))).	1	21	67	89	-29.1
21	>CBSV_JN091565.1_538-1063.seq|revcomp 68 21	>UCBSV_HM346952_1034-1553.seq	(((((((((((((((.(((((&.))))).))))))))))))))).	1	21	68	90	-31.5
22	>CBSV_JN091565.1_538-1063.seq|revcomp 69 21	>UCBSV_HM346952_1034-1553.seq	((((((((((((((((.((((&.)))).)))))))))))))))).	1	21	69	91	-30.9
23	>CBSV_JN091565.1_538-1063.seq|revcomp 70 21	>UCBSV_HM346952_1034-1553.seq	(((((((((((((((((.(((&.))).))))))))))))))))).	1	21	70	92	-30.8
24	>CBSV_JN091565.1_538-1063.seq|revcomp 71 21	>UCBSV_HM346952_1034-1553.seq	((((((((((((((((((.((&.)).)))))))))))))))))).	1	21	71	93	-29.4
25	>CBSV_JN091565.1_538-1063.seq|revcomp 72 21	>UCBSV_HM346952_1034-1553.seq	(((((((((((((((((((.&.))))))))))))))))))).	1	20	74	94	-28.2
26	>CBSV_JN091565.1_538-1063.seq|revcomp 73 21	>UCBSV_HM346952_1034-1553.seq	((((((((((((((((((((.&.)))))))))))))))))))).	1	21	74	95	-29.1
27	>CBSV_JN091565.1_538-1063.seq|revcomp 74 21	>UCBSV_HM346952_1034-1553.seq	(((((((((((((((((((((&.))))))))))))))))))))).	1	21	74	96	-29.9
28	>CBSV_JN091565.1_538-1063.seq|revcomp 75 21	>UCBSV_HM346952_1034-1553.seq	(((((((((((((((((((((&.))))))))))))))))))))).	1	21	75	97	-31.1
29	>CBSV_JN091565.1_538-1063.seq|revcomp 76 21	>UCBSV_HM346952_1034-1553.seq	(((((((((((((((((((((&.))))))))))))))))))))).	1	21	76	98	-33.9
30	>CBSV_JN091565.1_538-1063.seq|revcomp 77 21	>UCBSV_HM346952_1034-1553.seq	.((((((((((((((((((((&.)))))))))))))))))))).	1	21	77	98	-30.8
31	>CBSV_JN091565.1_538-1063.seq|revcomp 78 21	>UCBSV_HM346952_1034-1553.seq	.(((((((((((((((((((&.))))))))))))))))))).	2	21	78	98	-28.3
32	>CBSV_JN091565.1_538-1063.seq|revcomp 79 21	>UCBSV_HM346952_1034-1553.seq	.((((((((((((((((((&.)))))))))))))))))).	3	21	79	98	-27.6
33	>CBSV_JN091565.1_538-1063.seq|revcomp 80 21	>UCBSV_HM346952_1034-1553.seq	.(((((((((((((((((&.))))))))))))))))).	4	21	80	98	-25.5
34	>CBSV_JN091565.1_538-1063.seq|revcomp 121 21	>UCBSV_HM346952_1034-1553.seq	(((((((((((.((.((((((&.)))))).)).))))))))))).	1	21	121	143	-26.1
35	>CBSV_JN091565.1_538-1063.seq|revcomp 145 21	>UCBSV_HM346952_1034-1553.seq	(((((((((((((((((.((.&.)).))))))))))))))))).	1	21	146	167	-26
36	>CBSV_JN091565.1_538-1063.seq|revcomp 146 21	>UCBSV_HM346952_1034-1553.seq	.(((((((((((((((((.((&.)).))))))))))))))))).	1	21	146	167	-25.2
37	>CBSV_JN091565.1_538-1063.seq|revcomp 149 21	>UCBSV_HM346952_1034-1553.seq	((..(((((((((((((((((&.)))))))))))))))))..)).	1	21	149	171	-25
38	>CBSV_JN091565.1_538-1063.seq|revcomp 150 21	>UCBSV_HM346952_1034-1553.seq	(((..((((((((((((((((&.))))))))))))))))..))).	1	21	150	172	-26.2
39	>CBSV_JN091565.1_538-1063.seq|revcomp 151 21	>UCBSV_HM346952_1034-1553.seq	((((..(((((((((((((((&.)))))))))))))))..)))).	1	21	151	173	-29
40	>CBSV_JN091565.1_538-1063.seq|revcomp 152 21	>UCBSV_HM346952_1034-1553.seq	.((((..((((((((((((((&.))))))))))))))..)))).	1	21	152	173	-26.7
41	>CBSV_JN091565.1_538-1063.seq|revcomp 153 21	>UCBSV_HM346952_1034-1553.seq	.((((..(((((((((((((&.)))))))))))))..)))).	2	21	153	173	-25.4
42	>CBSV_JN091565.1_538-1063.seq|revcomp 154 21	>UCBSV_HM346952_1034-1553.seq	((.((((..((((((((((((&.))))))))))))..)))).)).	1	21	154	176	-25.3
43	>CBSV_JN091565.1_538-1063.seq|revcomp 190 21	>UCBSV_HM346952_1034-1553.seq	((((((((((.(((.((((((&.)))))).))).)))))))))).	1	21	190	212	-26.5
44	>CBSV_JN091565.1_538-1063.seq|revcomp 191 21	>UCBSV_HM346952_1034-1553.seq	.((((((((((.(((.(((((&.))))).))).)))))))))).	1	21	191	212	-26
45	>CBSV_JN091565.1_538-1063.seq|revcomp 192 21	>UCBSV_HM346952_1034-1553.seq	.((((((((((.(((.((((&.)))).))).)))))))))).	2	21	192	212	-25.1
46	>CBSV_JN091565.1_538-1063.seq|revcomp 200 21	>UCBSV_HM346952_1034-1553.seq	((((((.((.((((((((((.&.)))))))))).)).)))))).	1	21	201	222	-26.3
47	>CBSV_JN091565.1_538-1063.seq|revcomp 201 21	>UCBSV_HM346952_1034-1553.seq	(((((((.((.((((((((((&.)))))))))).)).))))))).	1	21	201	223	-25.1
48	>CBSV_JN091565.1_538-1063.seq|revcomp 204 21	>UCBSV_HM346952_1034-1553.seq	((((((((((.((.(((((((&.))))))).)).)))))))))).	1	21	204	226	-25.6
49	>CBSV_JN091565.1_538-1063.seq|revcomp 205 21	>UCBSV_HM346952_1034-1553.seq	(((((((((((.((.((((((&.)))))).)).))))))))))).	1	21	205	227	-26.1
50	>CBSV_JN091565.1_538-1063.seq|revcomp 241 21	>UCBSV_HM346952_1034-1553.seq	((((((((.((((((((.&.)))))))).)))))))).	1	18	245	263	-25.7
51	>CBSV_JN091565.1_538-1063.seq|revcomp 242 21	>UCBSV_HM346952_1034-1553.seq	.((((((((.((((((((.&.)))))))).)))))))).	1	19	245	263	-25.7
52	>CBSV_JN091565.1_538-1063.seq|revcomp 243 21	>UCBSV_HM346952_1034-1553.seq	(.((((((((.((((((((.&.)))))))).)))))))).).	1	20	245	265	-26.5
53	>CBSV_JN091565.1_538-1063.seq|revcomp 244 21	>UCBSV_HM346952_1034-1553.seq	((.((((((((.((((((((.&.)))))))).)))))))).)).	1	21	245	266	-27.2
54	>CBSV_JN091565.1_538-1063.seq|revcomp 245 21	>UCBSV_HM346952_1034-1553.seq	(((.((((((((.((((((((&.)))))))).)))))))).))).	1	21	245	267	-26.2
55	>CBSV_JN091565.1_538-1063.seq|revcomp 248 21	>UCBSV_HM346952_1034-1553.seq	((((((.((((((((.(((((&.))))).)))))))).)))))).	1	21	248	270	-25.9
56	>CBSV_JN091565.1_538-1063.seq|revcomp 249 21	>UCBSV_HM346952_1034-1553.seq	(((((((.((((((((.((((&.)))).)))))))).))))))).	1	21	249	271	-26.2
57	>CBSV_JN091565.1_538-1063.seq|revcomp 250 21	>UCBSV_HM346952_1034-1553.seq	((((((((.((((((((.((.&.)).)))))))).)))))))).	1	21	251	272	-29.1
58	>CBSV_JN091565.1_538-1063.seq|revcomp 251 21	>UCBSV_HM346952_1034-1553.seq	.((((((((.((((((((.&.)))))))).)))))))).	1	19	254	272	-27.9
59	>CBSV_JN091565.1_538-1063.seq|revcomp 252 21	>UCBSV_HM346952_1034-1553.seq	(.((((((((.((((((((.&.)))))))).)))))))).).	1	20	254	274	-28.7
60	>CBSV_JN091565.1_538-1063.seq|revcomp 253 21	>UCBSV_HM346952_1034-1553.seq	((.((((((((.((((((((.&.)))))))).)))))))).)).	1	21	254	275	-29.4
61	>CBSV_JN091565.1_538-1063.seq|revcomp 254 21	>UCBSV_HM346952_1034-1553.seq	(((.((((((((.((((((((&.)))))))).)))))))).))).	1	21	254	276	-28.8
62	>CBSV_JN091565.1_538-1063.seq|revcomp 255 21	>UCBSV_HM346952_1034-1553.seq	((((.((((((((.(((((((&.))))))).)))))))).)))).	1	21	255	277	-26.9
63	>CBSV_JN091565.1_538-1063.seq|revcomp 256 21	>UCBSV_HM346952_1034-1553.seq	(((((.((((((((.((((((&.)))))).)))))))).))))).	1	21	256	278	-26.1
64	>CBSV_JN091565.1_538-1063.seq|revcomp 257 21	>UCBSV_HM346952_1034-1553.seq	((((((.((((((((.(((((&.))))).)))))))).)))))).	1	21	257	279	-25.2
65	>CBSV_JN091565.1_538-1063.seq|revcomp 258 21	>UCBSV_HM346952_1034-1553.seq	(((((((.((((((((.((((&.)))).)))))))).))))))).	1	21	258	280	-26
66	>CBSV_JN091565.1_538-1063.seq|revcomp 259 21	>UCBSV_HM346952_1034-1553.seq	((((((((.((((((((.(((&.))).)))))))).)))))))).	1	21	259	281	-26
67	>CBSV_JN091565.1_538-1063.seq|revcomp 261 21	>UCBSV_HM346952_1034-1553.seq	((((((((((.((((((((.&.)))))))).)))))))))).	1	20	263	283	-25.1
68	>CBSV_JN091565.1_538-1063.seq|revcomp 262 21	>UCBSV_HM346952_1034-1553.seq	(((((((((((.((((((((.&.)))))))).))))))))))).	1	21	263	284	-25.6
69	>CBSV_JN091565.1_538-1063.seq|revcomp 263 21	>UCBSV_HM346952_1034-1553.seq	((((((((((((.((((((((&.)))))))).)))))))))))).	1	21	263	285	-26.5
70	>CBSV_JN091565.1_538-1063.seq|revcomp 264 21	>UCBSV_HM346952_1034-1553.seq	(((((((((((((.(((((((&.))))))).))))))))))))).	1	21	264	286	-27.1
71	>CBSV_JN091565.1_538-1063.seq|revcomp 265 21	>UCBSV_HM346952_1034-1553.seq	((((((((((((((.((((((&.)))))).)))))))))))))).	1	21	265	287	-27.6
72	>CBSV_JN091565.1_538-1063.seq|revcomp 266 21	>UCBSV_HM346952_1034-1553.seq	(((((((((((((((.(((((&.))))).))))))))))))))).	1	21	266	288	-27.7
73	>CBSV_JN091565.1_538-1063.seq|revcomp 267 21	>UCBSV_HM346952_1034-1553.seq	((((((((((((((((.((((&.)))).)))))))))))))))).	1	21	267	289	-27.9
74	>CBSV_JN091565.1_538-1063.seq|revcomp 268 21	>UCBSV_HM346952_1034-1553.seq	(((((((((((((((((.(((&.))).))))))))))))))))).	1	21	268	290	-26.7
75	>CBSV_JN091565.1_538-1063.seq|revcomp 269 21	>UCBSV_HM346952_1034-1553.seq	((((((((((((((((((.((&.)).)))))))))))))))))).	1	21	269	291	-28.7
76	>CBSV_JN091565.1_538-1063.seq|revcomp 270 21	>UCBSV_HM346952_1034-1553.seq	(((((((((((((((((((.&.))))))))))))))))))).	1	20	272	292	-27.7
77	>CBSV_JN091565.1_538-1063.seq|revcomp 271 21	>UCBSV_HM346952_1034-1553.seq	((((((((((((((((((((.&.)))))))))))))))))))).	1	21	272	293	-28.6
78	>CBSV_JN091565.1_538-1063.seq|revcomp 272 21	>UCBSV_HM346952_1034-1553.seq	(((((((((((((((((((((&.))))))))))))))))))))).	1	21	272	294	-28.3
79	>CBSV_JN091565.1_538-1063.seq|revcomp 273 21	>UCBSV_HM346952_1034-1553.seq	(((((((((((((((((((((&.))))))))))))))))))))).	1	21	273	295	-30.1
80	>CBSV_JN091565.1_538-1063.seq|revcomp 274 21	>UCBSV_HM346952_1034-1553.seq	(((((((((((((((((((((&.))))))))))))))))))))).	1	21	274	296	-30
81	>CBSV_JN091565.1_538-1063.seq|revcomp 275 21	>UCBSV_HM346952_1034-1553.seq	(((((((((((((((((((((&.))))))))))))))))))))).	1	21	275	297	-29.4
82	>CBSV_JN091565.1_538-1063.seq|revcomp 276 21	>UCBSV_HM346952_1034-1553.seq	(((((((((((((((((((((&.))))))))))))))))))))).	1	21	276	298	-32.1
83	>CBSV_JN091565.1_538-1063.seq|revcomp 277 21	>UCBSV_HM346952_1034-1553.seq	((((((((((((((((((((.&.)))))))))))))))))))).	1	21	278	299	-30
84	>CBSV_JN091565.1_538-1063.seq|revcomp 278 21	>UCBSV_HM346952_1034-1553.seq	(((((((((((((((((((((&.))))))))))))))))))))).	1	21	278	300	-29.3
85	>CBSV_JN091565.1_538-1063.seq|revcomp 279 21	>UCBSV_HM346952_1034-1553.seq	(((((((((((((((((((((&.))))))))))))))))))))).	1	21	279	301	-28
86	>CBSV_JN091565.1_538-1063.seq|revcomp 280 21	>UCBSV_HM346952_1034-1553.seq	(((((((((((((((((((((&.))))))))))))))))))))).	1	21	280	302	-27.7
87	>CBSV_JN091565.1_538-1063.seq|revcomp 281 21	>UCBSV_HM346952_1034-1553.seq	.((((((((((((((((((((&.)))))))))))))))))))).	1	21	281	302	-26.4
88	>CBSV_JN091565.1_538-1063.seq|revcomp 286 21	>UCBSV_HM346952_1034-1553.seq	((((..(((((((((((((((&.)))))))))))))))..)))).	1	21	286	308	-26
89	>CBSV_JN091565.1_538-1063.seq|revcomp 334 21	>UCBSV_HM346952_1034-1553.seq	(((((.(((((.(((((((.&.))))))).))))).))))).	1	20	336	356	-25.5
90	>CBSV_JN091565.1_538-1063.seq|revcomp 335 21	>UCBSV_HM346952_1034-1553.seq	((((((.(((((.(((((((.&.))))))).))))).)))))).	1	21	336	357	-26.6
91	>CBSV_JN091565.1_538-1063.seq|revcomp 336 21	>UCBSV_HM346952_1034-1553.seq	(((((((.(((((.((((((.&.)))))).))))).))))))).	1	21	337	358	-29
92	>CBSV_JN091565.1_538-1063.seq|revcomp 337 21	>UCBSV_HM346952_1034-1553.seq	((((((((.(((((.((((((&.)))))).))))).)))))))).	1	21	337	359	-30.4
93	>CBSV_JN091565.1_538-1063.seq|revcomp 338 21	>UCBSV_HM346952_1034-1553.seq	.((((((((.(((((.(((((&.))))).))))).)))))))).	1	21	338	359	-28.4
94	>CBSV_JN091565.1_538-1063.seq|revcomp 339 21	>UCBSV_HM346952_1034-1553.seq	.((((((((.(((((.((((&.)))).))))).)))))))).	2	21	339	359	-27.5
95	>CBSV_JN091565.1_538-1063.seq|revcomp 340 21	>UCBSV_HM346952_1034-1553.seq	((.((((((((.(((((.((.&.)).))))).)))))))).)).	1	21	341	362	-27.3
96	>CBSV_JN091565.1_538-1063.seq|revcomp 341 21	>UCBSV_HM346952_1034-1553.seq	(((.((((((((.(((((.((&.)).))))).)))))))).))).	1	21	341	363	-27.1
97	>CBSV_JN091565.1_538-1063.seq|revcomp 342 21	>UCBSV_HM346952_1034-1553.seq	((((.((((((((.(((((.&.))))).)))))))).)))).	1	20	344	364	-27.7
98	>CBSV_JN091565.1_538-1063.seq|revcomp 343 21	>UCBSV_HM346952_1034-1553.seq	(((((.((((((((.(((((.&.))))).)))))))).))))).	1	21	344	365	-29.1
99	>CBSV_JN091565.1_538-1063.seq|revcomp 344 21	>UCBSV_HM346952_1034-1553.seq	((((((.((((((((.(((((&.))))).)))))))).)))))).	1	21	344	366	-29.5
100	>CBSV_JN091565.1_538-1063.seq|revcomp 345 21	>UCBSV_HM346952_1034-1553.seq	.((((((.((((((((.((((&.)))).)))))))).)))))).	1	21	345	366	-28.8
101	>CBSV_JN091565.1_538-1063.seq|revcomp 346 21	>UCBSV_HM346952_1034-1553.seq	.((((((.((((((((.(((&.))).)))))))).)))))).	2	21	346	366	-27.5
102	>CBSV_JN091565.1_538-1063.seq|revcomp 347 21	>UCBSV_HM346952_1034-1553.seq	.((((((.((((((((.((&.)).)))))))).)))))).	3	21	347	366	-25.9
103	>CBSV_JN091565.1_538-1063.seq|revcomp 348 21	>UCBSV_HM346952_1034-1553.seq	(((.((((((.((((((((.&.)))))))).)))))).))).	1	20	350	370	-25.8
104	>CBSV_JN091565.1_538-1063.seq|revcomp 349 21	>UCBSV_HM346952_1034-1553.seq	((((.((((((.((((((((.&.)))))))).)))))).)))).	1	21	350	371	-26.2
105	>CBSV_JN091565.1_538-1063.seq|revcomp 350 21	>UCBSV_HM346952_1034-1553.seq	(((((.((((((.((((((((&.)))))))).)))))).))))).	1	21	350	372	-26
106	>CBSV_JN091565.1_538-1063.seq|revcomp 351 21	>UCBSV_HM346952_1034-1553.seq	((((((.((((((.(((((((&.))))))).)))))).)))))).	1	21	351	373	-25.1
107	>CBSV_JN091565.1_538-1063.seq|revcomp 366 21	>UCBSV_HM346952_1034-1553.seq	(((((((((((((.(((((((&.))))))).))))))))))))).	1	21	366	388	-26.8
108	>CBSV_JN091565.1_538-1063.seq|revcomp 367 21	>UCBSV_HM346952_1034-1553.seq	((((((((((((((.((((((&.)))))).)))))))))))))).	1	21	367	389	-26.1
109	>CBSV_JN091565.1_538-1063.seq|revcomp 368 21	>UCBSV_HM346952_1034-1553.seq	(((((((((((((((.(((((&.))))).))))))))))))))).	1	21	368	390	-28.6
110	>CBSV_JN091565.1_538-1063.seq|revcomp 369 21	>UCBSV_HM346952_1034-1553.seq	((((((((((((((((.((((&.)))).)))))))))))))))).	1	21	369	391	-28.5
111	>CBSV_JN091565.1_538-1063.seq|revcomp 370 21	>UCBSV_HM346952_1034-1553.seq	((((((((((((((((((((.&.)))..))))))))))))))))).	1	21	369	392	-31.4
112	>CBSV_JN091565.1_538-1063.seq|revcomp 371 21	>UCBSV_HM346952_1034-1553.seq	.((((((((((((((((((((&.)))..))))))))))))))))).	1	21	369	392	-29.9
113	>CBSV_JN091565.1_538-1063.seq|revcomp 372 21	>UCBSV_HM346952_1034-1553.seq	.(((((((((((((((((.&.))))))))))))))))).	2	20	374	392	-29.2
114	>CBSV_JN091565.1_538-1063.seq|revcomp 373 21	>UCBSV_HM346952_1034-1553.seq	((.(((((((((((((((((.&.))))))))))))))))).)).	1	21	374	395	-30.1
115	>CBSV_JN091565.1_538-1063.seq|revcomp 374 21	>UCBSV_HM346952_1034-1553.seq	.((.(((((((((((((((((&.))))))))))))))))).)).	1	21	374	395	-29.6
116	>CBSV_JN091565.1_538-1063.seq|revcomp 375 21	>UCBSV_HM346952_1034-1553.seq	(.((.((((((((((((((((&.)))))))))))))))).)).).	1	21	375	397	-27
117	>CBSV_JN091565.1_538-1063.seq|revcomp 376 21	>UCBSV_HM346952_1034-1553.seq	((.((.(((((((((((((((&.)))))))))))))))...)).)).	1	21	376	400	-26.4
118	>CBSV_JN091565.1_538-1063.seq|revcomp 377 21	>UCBSV_HM346952_1034-1553.seq	.((.((.((((((((((((((&.))))))))))))))...)).)).	1	21	377	400	-25.3
119	>CBSV_JN091565.1_538-1063.seq|revcomp 397 21	>UCBSV_HM346952_1034-1553.seq	(((((..(((((((.(((((.&.))))).)))))))..))))).	1	21	398	419	-25.3
120	>CBSV_JN091565.1_538-1063.seq|revcomp 398 21	>UCBSV_HM346952_1034-1553.seq	((((((..(((((((.(((((&.))))).)))))))..)))))).	1	21	398	420	-28.4
121	>CBSV_JN091565.1_538-1063.seq|revcomp 399 21	>UCBSV_HM346952_1034-1553.seq	(((((((..(((((((.((((&.)))).)))))))..))))))).	1	21	399	421	-26.3
122	>CBSV_JN091565.1_538-1063.seq|revcomp 400 21	>UCBSV_HM346952_1034-1553.seq	((((((((..(((((((.(((&.))).)))))))..)))))))).	1	21	400	422	-27.3
123	>CBSV_JN091565.1_538-1063.seq|revcomp 401 21	>UCBSV_HM346952_1034-1553.seq	(((((((((..(((((((.&.)))))))..))))))))).	1	19	404	423	-29.6
124	>CBSV_JN091565.1_538-1063.seq|revcomp 402 21	>UCBSV_HM346952_1034-1553.seq	((((((((((..(((((((.&.)))))))..)))))))))).	1	20	404	424	-30.7
125	>CBSV_JN091565.1_538-1063.seq|revcomp 403 21	>UCBSV_HM346952_1034-1553.seq	(((((((((((..(((((((.&.)))))))..))))))))))).	1	21	404	425	-31.8
126	>CBSV_JN091565.1_538-1063.seq|revcomp 404 21	>UCBSV_HM346952_1034-1553.seq	((((((((((((..(((((((&.)))))))..)))))))))))).	1	21	404	426	-35
127	>CBSV_JN091565.1_538-1063.seq|revcomp 405 21	>UCBSV_HM346952_1034-1553.seq	.((((((((((((..((((((&.))))))..)))))))))))).	1	21	405	426	-33.6
128	>CBSV_JN091565.1_538-1063.seq|revcomp 406 21	>UCBSV_HM346952_1034-1553.seq	.((((((((((((..(((((&.)))))..)))))))))))).	2	21	406	426	-30.9
129	>CBSV_JN091565.1_538-1063.seq|revcomp 407 21	>UCBSV_HM346952_1034-1553.seq	.((((((((((((..((((&.))))..)))))))))))).	3	21	407	426	-29.1
130	>CBSV_JN091565.1_538-1063.seq|revcomp 408 21	>UCBSV_HM346952_1034-1553.seq	(..(((((((((((((.(((.&.))))))))))))))).)..).	1	21	410	431	-27.7
131	>CBSV_JN091565.1_538-1063.seq|revcomp 409 21	>UCBSV_HM346952_1034-1553.seq	.(..(((((((((((((.(((&.))))))))))))))).)..).	1	21	410	431	-27.3
132	>CBSV_JN091565.1_538-1063.seq|revcomp 410 21	>UCBSV_HM346952_1034-1553.seq	(((.((((((((((((((.&.)))))))))))).))))).	1	19	413	432	-27.1
133	>CBSV_JN091565.1_538-1063.seq|revcomp 411 21	>UCBSV_HM346952_1034-1553.seq	((((.((((((((((((((.&.)))))))))))).)))))).	1	20	413	433	-29.4
134	>CBSV_JN091565.1_538-1063.seq|revcomp 412 21	>UCBSV_HM346952_1034-1553.seq	(((((.((((((((((((((.&.)))))))))))).))))))).	1	21	413	434	-33.2
135	>CBSV_JN091565.1_538-1063.seq|revcomp 413 21	>UCBSV_HM346952_1034-1553.seq	.(((((.((((((((((((((&.)))))))))))).))))))).	1	21	413	434	-32.7
136	>CBSV_JN091565.1_538-1063.seq|revcomp 414 21	>UCBSV_HM346952_1034-1553.seq	.(((((.(((((((((((((&.))))))))))).))))))).	2	21	414	434	-31
137	>CBSV_JN091565.1_538-1063.seq|revcomp 415 21	>UCBSV_HM346952_1034-1553.seq	((.(((((.((((((((((((&.)))))))))).))))))).)).	1	21	415	437	-31.2
138	>CBSV_JN091565.1_538-1063.seq|revcomp 416 21	>UCBSV_HM346952_1034-1553.seq	.((.(((((.(((((((((((&.))))))))).))))))).)).	1	21	416	437	-28.2
139	>CBSV_JN091565.1_538-1063.seq|revcomp 417 21	>UCBSV_HM346952_1034-1553.seq	.((.(((((.((((((((((&.)))))))).))))))).)).	2	21	417	437	-25.7
